# Supplementary figures and images for: Investigating Various Products of IMERG for Precipitation Retrieval Over Surfaces With and Without Snow and Ice Cover
Source: Preprints.org preprint supplement (doi:10.20944/preprints202106.0120.v1), 2021-06-03

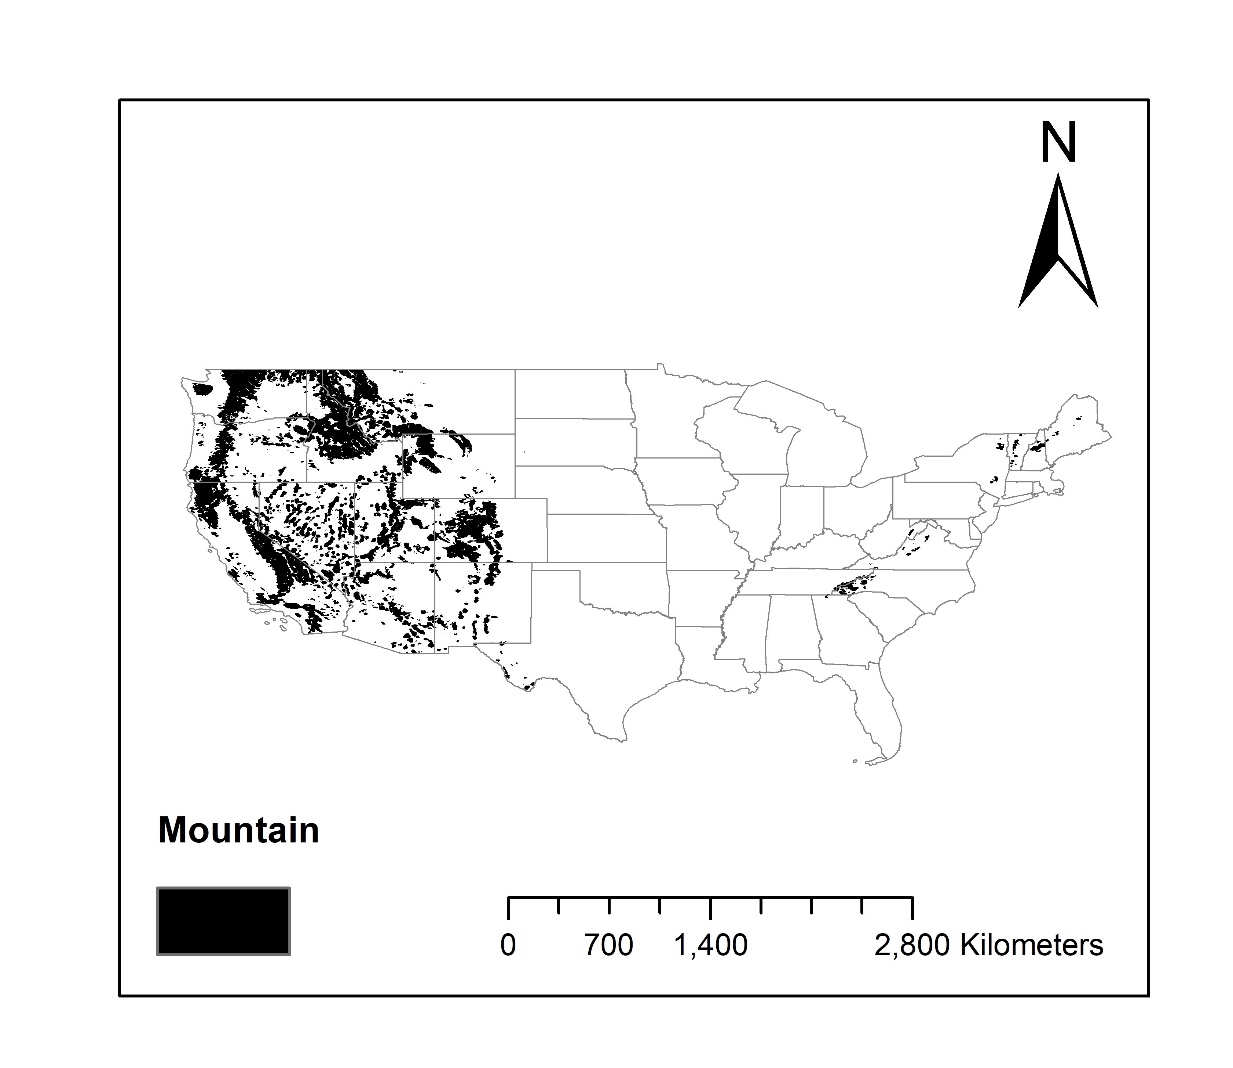


Figure S1. Mask of high and high-scatter mountains based on K3 mountain maps

Supplement: Supplementary file 2 [file supplementary]
